# Supplementary material for: D-Dimer Varies Widely Across Instrument Platforms and is Not a Reliable Indicator of Periprosthetic Joint Infections
Source: PubMed Central journal article supplement — Arthroplast Today. 2020 Aug 23;6(4):686–8. doi: 10.1016/j.artd.2020.07.014 (PMC7451938; doi:10.1016/j.artd.2020.07.014), 2020-08-23
Supplement: mmc1.pdf [file mmc1.pdf]

# INDIVIDUAL CONFLICT OF INTEREST STATEMENT

## *American Association of Hip and Knee Surgeons*

(Adopted from the American Academy of Orthopaedic Surgeons disclosure statement)

The following form **must be filled out completely and submitted by each author (example, 6 authors, 6 forms).**  
**All items require a response. If there is no relevant disclosure for a given item, enter "None."**

**Manuscript Title** D-dimer varies widely across instrument platforms and is not a reliable indicator of periprosthetic joint infections

1. Royalties from a company or supplier (The following conflicts were disclosed)

None

2. Speakers bureau/paid presentations for a company or supplier (The following conflicts were disclosed)

None

3A. Paid employee for a company or supplier (The following conflicts were disclosed)

None

~~None~~ University of UTAH

3B. Paid consultant for a company or supplier (The following conflicts were disclosed)

None

3C. Unpaid consultants for a company or supplier (The following conflicts were disclosed)

None

4. Stock or stock options in a company or supplier (The following conflicts were disclosed)

None

5. Research support from a company or supplier as a Principal Investigator (The following conflicts were disclosed)

None

6. Other financial or material support from a company or supplier (The following conflicts were disclosed)

None

7. Royalties, financial or material support from publishers (The following conflicts were disclosed)

None

8. Medical/Orthopaedic publications editorial/governing board (The following conflicts were disclosed)

None

LAB MEDICINE, American Journal of Clinical Pathology (ASSIST editor)  
(Assoc editor)

9. Board member/committee appointments for a society (The following conflicts were disclosed)

None

**Each author must sign AND print or type his/her name, date and submit a separate form**

In addition, one BLINDED Conflict of Interest form (no author names used) should be submitted per manuscript with all author disclosures.

ROBERT SCHMIDT

Author Name (Print or Type)

RL Schmidt

Author Signature

3/09/2020

Date
